# Supplementary material
Source: Research Square preprint supplement (doi:10.21203/rs.3.rs-9013333/v1)
Supplement: Supplementary file 1 [file d32c4f59000ea4e126c66bb2.docx]

Supplementary Material for “Evaluation of the public health and economic impact of universal influenza vaccination in Mexico”

Content

[1. Epidemiological Modeling 2](#_Toc208318874)

[1.1. Model Compartments and Transitions 2](#_Toc208318875)

[1.3. Age-Specific Transition Equations 3](#_Toc208318876)

[1.4. Model Parameters 7](#_Toc208318877)

[2. Economic Evaluation 7](#_Toc208318878)

[2.1. Health Economic Model Structure 7](#_Toc208318879)

[2.2. Vaccination Costs 8](#_Toc208318880)

[3. Scenario Analysis Results 9](#_Toc208318881)

[3.1. Relative Reduction in Health Outcomes 10](#_Toc208318882)

[3.2. Relative Cost Reductions 11](#_Toc208318883)

[3.3. Interpretation and Discussion of Alternative Scenarios 12](#_Toc208318884)

[4. Universal Vaccination Results 13](#_Toc208318885)

[4.1. Low Incidence Season (2017–2018) 13](#_Toc208318886)

[4.2. High Incidence Season (2015–2016) 15](#_Toc208318887)

[5. References 17](#_Toc208318888)

# 1. Epidemiological Modeling

## 1.1. Model Compartments and Transitions

We developed a stochastic, age-structured compartmental model to simulate the dynamic transmission of influenza [1]. The model comprises two parallel sub-models representing vaccinated and unvaccinated populations. Each sub-model includes seven compartments that reflect the natural history and clinical outcomes of influenza: Susceptible (S), Exposed (E), Asymptomatic infected (IA), Symptomatic infected (IC), Hospitalized (H), Recovered (R), and Deceased (D). The model was implemented using the odin.dust framework. The equations governing the transitions between these compartments are described in the following sections.


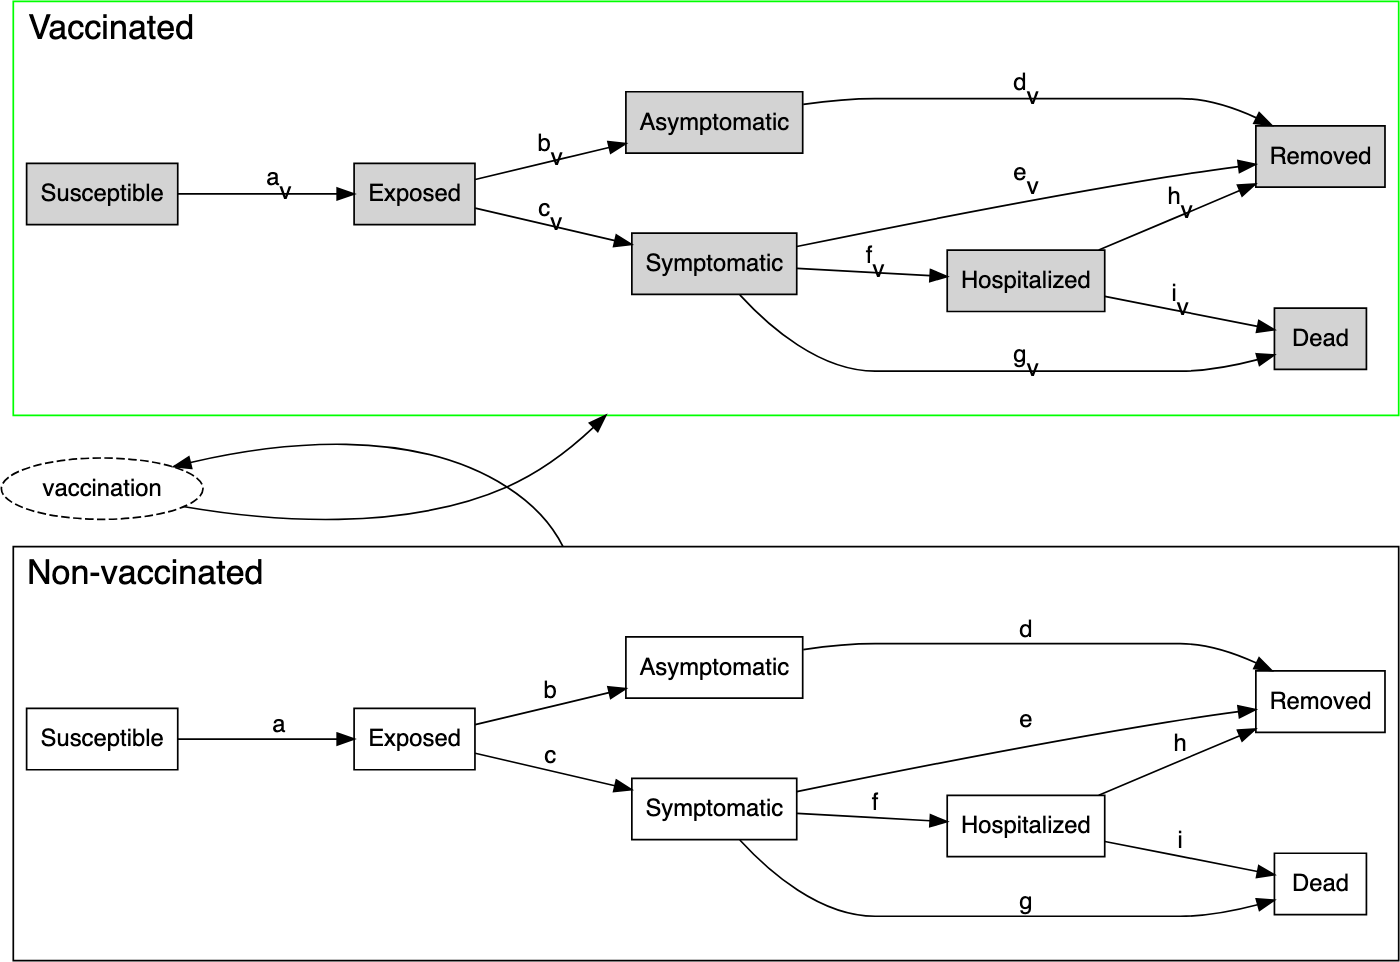


Supplementary figure 1. Representation of the influenza model

## 1.3. Age-Specific Transition Equations

#### 1.3.1. Core equations for transitions between compartments per age for the susceptible population.

In the following equations, the i superscript stands for the age group.

#### 1.3.2. Core equations for transitions between compartments per age for the vaccinated population:

Flows between compartments are based on binomial distributions:

(a)

(b)

(c)

(d)

(g)

(f)

(e)

(i)

(h)

(av)

(bv)

(cv)

(dv)

(gv)

(fv)

(ev)

(iv)

(hv)

All equations are time dependent, but we removed (t) to simplify the notations. Vaccination coverage ramp-up is considered through the time-serie tcoverage[i,time] giving the probability of getting vaccinated for age group i at time. stands for the vaccine efficacy detailed in the main text.

#### 1.3.3 . Transition probabilities:

Each flow is associated with a transition probability:

The different parameters are detailed in the Supplementary table 1

The force of infection, , is given by:

where is the contact matrix given by

,

is a sinusoidal timeserie whose maximum is reached during the flu epidemic season, is the number of contacts between agegroups i and j, and is a reduction factor to account for a reduction of infectivity in asymptomatic cases set at 0.5 (assumption). is the number of imported infected seeding the epidemic set at 200 per age groups.

## 1.4. Model Parameters

Supplementary table 1. Epidemiological model parameters

| Parameter | Description | value | Source |
| --- | --- | --- | --- |
|  | Probability of transmission per contact | [0.0515 to 0.0599] | Calibrated on influenza season |
|  | Mean duration of exposed status. | 2 days | Carrat et al, 2008 [2] |
|  | Mean duration of infected status. | 6.5 days | Carrat et al, 2008 [2] |
|  | Mean duration of asymptomatic state. | 4.36 days (mean) | Carrat et al, 2008 [2] |
|  | Mean duration of hospitalization | 8 days | Lemaitre et al, 2022 [3]. |
|  | Mean duration of immunity against infection after vaccination | 1 year | Assumption |
|  | Mean duration of immunity against infection after infection | 1 year | Assumption |
|  | Probability of being asymptomatic | 0.125 for 0-4yo  0.5 | Carrat et al, 2008 [2], and calibration |
|  | Probability of dying with symptomatic infection. | 0 | assumed to be negligible |
|  | Probability of hospitalization with symptomatic infection. | See Table 3 | |
|  | Probability of dying during hospitalization. |

# 2. Economic Evaluation

## 2.1. Health Economic Model Structure

Supplementary figure 2. Representation of the health economic model

## 2.2. Vaccination Costs

The average vaccination cost under the seasons analyzed is presented in Supplementary table 2, which details the total expenditure by age group for both the universal vaccination strategy and the current coverage scenario. These totals result from the combination of vaccine acquisition and administration costs. The unit prices used for vaccine acquisition are shown in Supplementary table 3, where trivalent vaccines ranged from USD 2.52 to USD 3.20 per dose depending on the country of origin, while quadrivalent vaccines ranged from USD 5.50 to USD 5.85, yielding an average cost of USD 3.98 per 0.5 mL pediatric dose. These unit costs were then applied across age groups to estimate total vaccine expenditure under each scenario.

The per-person administration and handling cost was obtained from Gutierrez and Bertozzi [4] and updated to December 2023 prices using the local inflation rate (119.71%) [5], corresponding to an increase from USD 2.80 in 2005 to USD 6.15 in 2023.

In the 6m–4 y and 60+ y age groups, the vaccination coverage rate (VCR) is assumed to remain the same across both scenarios. However, the total vaccination cost in these groups shows a slight increase under the universal vaccination scenario. This increase is explained by a small rise in the number of individuals eligible for vaccination (between 0.14% and 0.73%). The reason is that universal vaccination reduces overall influenza circulation, resulting in fewer individuals acquiring natural immunity through infection. Consequently, a slightly larger proportion remains eligible to receive the vaccine. Additionally, because the vaccination campaign overlaps with the beginning of the influenza season, some individuals who would otherwise have been infected remain susceptible and therefore require vaccination.

Supplementary table 2. Vaccination cost

|  | Cost of Influenza Vaccination Strategies (USD millions) | | |  | | |  |
| --- | --- | --- | --- | --- | --- | --- | --- |
| Age group | **Universal vaccination strategy** | | | **Current coverage (base case scenario)** | | | **Total Difference** |
| *Vaccines* | *Administration and handling* | *Total* | *Vaccines* | *Administration and handling* | *Total* |
| 6m- 4 y* | 53.95 | 4.91 | 58.86 | 53.63 | 4.87 | 58.50 | 0.35 |
| 5 – 19 y | 80.21 | 7.29 | 87.50 | 7.12 | 0.65 | 7.77 | 79.72 |
| 20 – 29 y | 32.49 | 2.95 | 35.44 | 6.40 | 0.58 | 6.98 | 28.46 |
| 30 – 39 y | 28.49 | 2.59 | 31.08 | 6.59 | 0.60 | 7.19 | 23.89 |
| 40 – 49 y | 23.68 | 2.15 | 25.83 | 8.51 | 0.77 | 9.28 | 16.54 |
| 50 – 59 y | 22.83 | 2.07 | 24.90 | 11.07 | 1.01 | 12.08 | 12.84 |
| 60+ y | 52.38 | 4.76 | 57.14 | 52.11 | 4.73 | 56.84 | 0.29 |
| Total | 294.03 | 26.71 | 320.74 | 145.43 | 13.22 | 158.65 | 161.09 |

*It considers the usage of first and second dose for primary influenza vaccination.

Supplementary table 3. Vaccine cost per dose

| Vaccine type | Origin | Price per dose (USD) |
| --- | --- | --- |
| Trivalent | South Korea | USD 3.20 |
| Brazil | USD 2.52 |
| Australia | USD 2.83 |
| Quadrivalent | France (prefilled syringe) | USD 5.85 |
| South Korea | USD 5.50 |
| Average | | USD 3.98 |

*Cost of 0.5mL pediatric vaccine

# 3. Scenario Analysis Results

Scenario analyses illustrate the impact of two contrasting vaccination coverage rate (VCR) scenarios:
a) 80% VCR in individuals 50+ old, recommended but not applied in the practice, and
b) 80% VCR in individuals 5-19 years (total gap of 24% to reach it, given current VCR)

These scenarios represent a gradual increase in vaccination uptake leading toward full implementation of the Universal Influenza Vaccine.

Supplementary table 4. Scenario analysis for 50+ and school vaccination

| Age group (years) | 6 months – 4 y | 5-19 | 20-29 | 30-39 | 40-49 | 50-59 | 60 + | General population |
| --- | --- | --- | --- | --- | --- | --- | --- | --- |
| 50+; VCR: 80% | 80.23% | 5.25% | 7.40% | 8.68% | 13.52% | 80.00% | 90.93% | 29.19% |
| School vaccination  VCR: 24% | 80.23% | 23.71% | 7.40% | 8.68% | 13.52% | 26.16% | 90.93% | 29.19% |


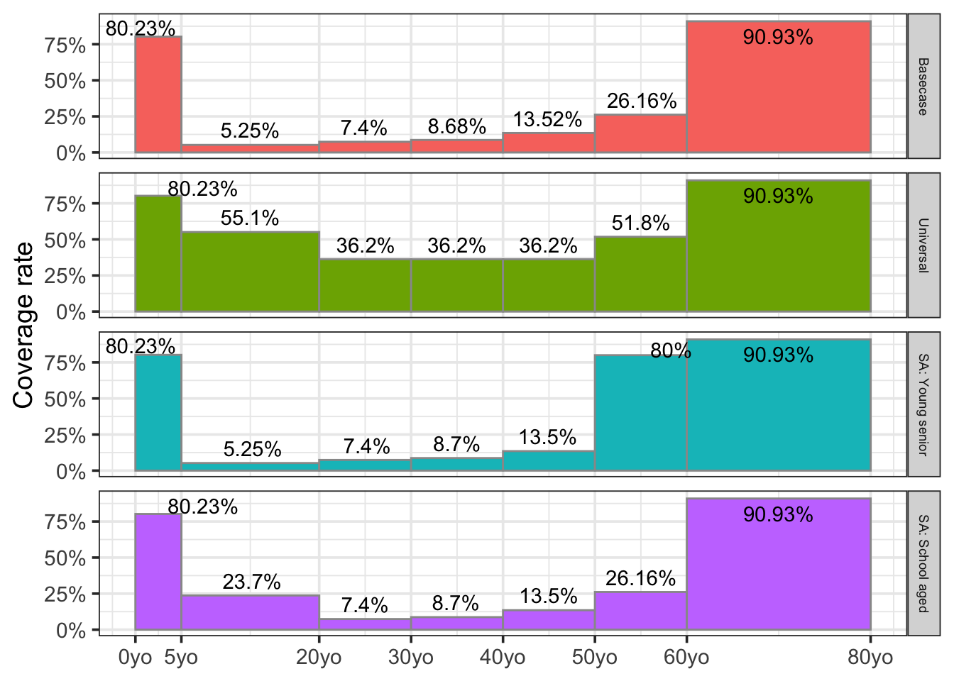


Supplementary figure 3. Age-specific influenza vaccination coverage rates under alternative scenarios in Mexico

## 3.1. Relative Reduction in Health Outcomes

Supplementary table 5. Relative reduction in the number of cases by alternative scenario analysis

| Outcome | | Base case scenario  (current coverage) | Relative reduction:  VCR 80% for 50 + | Relative reduction:  VCR 24% for 5-19 |
| --- | --- | --- | --- | --- |
| Symptomatic | **Total** | 13074000 [7623000 ; 19886000] | 3.31% [1.34% ; 5.73%] | 17.31% [9.7% ; 28.78%] |
| 0- 4 y | 1364000 [739000 ; 2337000] | 2.29% [-0.24% ; 5.17%] | 15.56% [8.52% ; 26.45%] |
| 5 – 19 y | 6708000 [4104000 ; 9413000] | 1.31% [-0.32% ; 3.91%] | 18.94% [11.11% ; 30.46%] |
| 20 – 29 y | 1061000 [565000 ; 1823000] | 4.88% [2.56% ; 7.51%] | 15.93% [8.61% ; 26.83%] |
| 30 – 39 y | 1204000 [665000 ; 1960000] | 2.7% [0.53% ; 5.32%] | 15.86% [8.61% ; 27.19%] |
| 40 – 49 y | 1619000 [935000 ; 2474000] | 2.28% [0.49% ; 4.86%] | 15.37% [7.98% ; 26.98%] |
| 50 – 59 y | 639000 [347000 ; 1070000] | 26.19% [24.29% ; 28.06%] | 15.68% [8.52% ; 26.76%] |
| 60+ y | 478000 [263000 ; 810000] | 3.75% [1.35% ; 6.12%] | 15.48% [8.7% ; 26.55%] |
| GP consultations | **Total** | 3166000 [1839000 ; 4852000] | 3.26% [1.27% ; 5.7%] | 17.2% [9.62% ; 28.65%] |
| 0- 4 y | 445000 [241000 ; 763000] | 2.29% [-0.24% ; 5.17%] | 15.56% [8.52% ; 26.45%] |
| 5 – 19 y | 1527000 [934000 ; 2142000] | 1.31% [-0.32% ; 3.91%] | 18.94% [11.11% ; 30.46%] |
| 20 – 29 y | 238000 [127000 ; 409000] | 4.88% [2.56% ; 7.51%] | 15.93% [8.61% ; 26.83%] |
| 30 – 39 y | 270000 [149000 ; 440000] | 2.7% [0.53% ; 5.32%] | 15.86% [8.61% ; 27.19%] |
| 40 – 49 y | 364000 [210000 ; 555000] | 2.28% [0.49% ; 4.86%] | 15.37% [7.98% ; 26.98%] |
| 50 – 59 y | 143000 [78000 ; 240000] | 26.19% [24.29% ; 28.06%] | 15.68% [8.52% ; 26.76%] |
| 60+ y | 179000 [98000 ; 303000] | 3.75% [1.35% ; 6.12%] | 15.48% [8.7% ; 26.55%] |
| Hospitalizations | **Total** | 72000 [40000 ; 118000] | 6.86% [4.62% ; 9.21%] | 15.94% [8.77% ; 27.12%] |
| 0- 4 y | 19000 [10000 ; 33000] | 2.29% [-0.24% ; 5.17%] | 15.56% [8.52% ; 26.45%] |
| 5 – 19 y | 7000 [4000 ; 10000] | 1.31% [-0.32% ; 3.91%] | 18.94% [11.11% ; 30.46%] |
| 20 – 29 y | 4000 [2000 ; 8000] | 4.88% [2.56% ; 7.51%] | 15.93% [8.61% ; 26.83%] |
| 30 – 39 y | 5000 [3000 ; 8000] | 2.7% [0.53% ; 5.32%] | 15.86% [8.61% ; 27.19%] |
| 40 – 49 y | 7000 [4000 ; 10000] | 2.28% [0.49% ; 4.86%] | 15.37% [7.98% ; 26.98%] |
| 50 – 59 y | 12000 [7000 ; 21000] | 26.19% [24.29% ; 28.06%] | 15.68% [8.52% ; 26.76%] |
| 60+ y | 17000 [9000 ; 28000] | 3.75% [1.35% ; 6.12%] | 15.48% [8.7% ; 26.55%] |
| Deaths | **Total** | 5400 [2980 ; 9060] | 7.21% [4.86% ; 9.42%] | 15.66% [8.7% ; 26.76%] |
| 0- 4 y | 50 [30 ; 90] | 2.29% [-0.24% ; 5.17%] | 15.56% [8.52% ; 26.45%] |
| 5 – 19 y | 140 [90 ; 190] | 1.31% [-0.32% ; 3.91%] | 18.94% [11.11% ; 30.46%] |
| 20 – 29 y | 100 [50 ; 160] | 4.88% [2.56% ; 7.51%] | 15.93% [8.61% ; 26.83%] |
| 30 – 39 y | 110 [60 ; 180] | 2.7% [0.53% ; 5.32%] | 15.86% [8.61% ; 27.19%] |
| 40 – 49 y | 150 [80 ; 220] | 2.28% [0.49% ; 4.86%] | 15.37% [7.98% ; 26.98%] |
| 50 – 59 y | 860 [460 ; 1430] | 26.19% [24.29% ; 28.06%] | 15.68% [8.52% ; 26.76%] |
| 60+ y | 4000 [2200 ; 6780] | 3.75% [1.35% ; 6.12%] | 15.48% [8.7% ; 26.55%] |
| Life Years lost | **Total** | 85000 [47000 ; 141000] | 8.39% [6.11% ; 10.55%] | 15.77% [8.73% ; 26.93%] |
| 0- 4 y | 2000 [1000 ; 3000] | 2.29% [-0.24% ; 5.17%] | 15.56% [8.52% ; 26.45%] |
| 5 – 19 y | 5000 [3000 ; 6000] | 1.31% [-0.32% ; 3.91%] | 18.94% [11.11% ; 30.46%] |
| 20 – 29 y | 3000 [2000 ; 5000] | 4.88% [2.56% ; 7.51%] | 15.93% [8.61% ; 26.83%] |
| 30 – 39 y | 3000 [2000 ; 5000] | 2.7% [0.53% ; 5.32%] | 15.86% [8.61% ; 27.19%] |
| 40 – 49 y | 4000 [2000 ; 6000] | 2.28% [0.49% ; 4.86%] | 15.37% [7.98% ; 26.98%] |
| 50 – 59 y | 18000 [10000 ; 31000] | 26.19% [24.29% ; 28.06%] | 15.68% [8.52% ; 26.76%] |
| 60+ y | 50000 [28000 ; 85000] | 3.75% [1.35% ; 6.12%] | 15.48% [8.7% ; 26.55%] |
| QALY lost | **Total** | 187000 [107000 ; 295000] | 5.25% [3.23% ; 7.59%] | 16.76% [9.35% ; 28.14%] |
| 0- 4 y | 15000 [8000 ; 25000] | 2.29% [-0.24% ; 5.17%] | 15.56% [8.52% ; 26.45%] |
| 5 – 19 y | 65000 [40000 ; 91000] | 1.31% [-0.32% ; 3.91%] | 18.94% [11.11% ; 30.46%] |
| 20 – 29 y | 12000 [7000 ; 21000] | 4.88% [2.56% ; 7.51%] | 15.93% [8.61% ; 26.83%] |
| 30 – 39 y | 14000 [8000 ; 22000] | 2.7% [0.53% ; 5.32%] | 15.86% [8.61% ; 27.19%] |
| 40 – 49 y | 18000 [10000 ; 27000] | 2.28% [0.49% ; 4.86%] | 15.37% [7.98% ; 26.98%] |
| 50 – 59 y | 21000 [12000 ; 36000] | 26.19% [24.29% ; 28.06%] | 15.68% [8.52% ; 26.76%] |
| 60+ y | 43000 [24000 ; 73000] | 3.75% [1.35% ; 6.12%] | 15.48% [8.7% ; 26.55%] |
| Workdays lost * | **Total** | 4483000 [2577000 ; 6959000] | 3.96% [1.95% ; 6.41%] | 16.83% [9.28% ; 28.23%] |
| 0- 4 y | 471000 [255000 ; 806000] | 2.29% [-0.24% ; 5.17%] | 15.56% [8.52% ; 26.45%] |
| 5 – 19 y | 1614000 [987000 ; 2264000] | 1.31% [-0.32% ; 3.91%] | 18.94% [11.11% ; 30.46%] |
| 20 – 29 y | 467000 [249000 ; 802000] | 4.88% [2.56% ; 7.51%] | 15.93% [8.61% ; 26.83%] |
| 30 – 39 y | 618000 [342000 ; 1007000] | 2.7% [0.53% ; 5.32%] | 15.86% [8.61% ; 27.19%] |
| 40 – 49 y | 837000 [484000 ; 1279000] | 2.28% [0.49% ; 4.86%] | 15.37% [7.98% ; 26.98%] |
| 50 – 59 y | 298000 [162000 ; 499000] | 26.19% [24.29% ; 28.06%] | 15.68% [8.52% ; 26.76%] |
| 60+ y | 178000 [98000 ; 302000] | 3.75% [1.35% ; 6.12%] | 15.48% [8.7% ; 26.55%] |

*For 0 to 19 y workdays lost is associated to caregivers.

## 3.2. Relative Cost Reductions

Supplementary table 6. Relative reduction in costs by alternative scenario analysis (USD millions)

| Costs | Base case scenario  (current coverage) | Relative cost reduction:  VCR 80% for 50 + | Relative cost reduction:  VCR 24% for 5-19 + |
| --- | --- | --- | --- |
| GP consultations | 235.86 [137.08 ; 361.83] | 3.26% [1.27% ; 5.7%] | 17.2% [9.62% ; 28.65%] |
| Hospitalizations | 319.99 [177.14 ; 529.16] | 7.78% [5.55% ; 10.09%] | 15.84% [8.7% ; 26.99%] |
| Productivity loss * | 125.66 [72.29 ; 195.21] | 3.96% [1.95% ; 6.41%] | 16.83% [9.28% ; 28.23%] |

## 3.3. Interpretation and Discussion of Alternative Scenarios

Both vaccination strategies offer distinct benefits. Vaccinating adults aged 50 years and older provides direct protection against hospitalization and death, with a stronger effect on reducing mortality compared to school-based vaccination. However, the benefits of this strategy may be underestimated, as our analysis did not account for high-risk subgroups or individuals with comorbidities, who may represent up to 50% of this age group [9].

In contrast, vaccinating school-aged children, particularly those over five years old, who are known to be efficient transmitters of influenza viruses [7]. can substantially reduce virus circulation. This indirect protection helps prevent secondary infections with fewer vaccine doses, an effect previously reported in other studies [39]. These findings are supported by our dynamic modeling approach, which incorporates contact matrices estimated for Mexico by Prem et al., [8].

When considering a stepwise pathway toward universal vaccination, both scenarios should be evaluated not only in terms of health impact but also considering other key criteria. These include reaching high-risk populations already recommended but not fully vaccinated, assessing feasibility and cost of campaign implementation, and exploring potential synergies with other public health programs; for instance, the current HPV vaccination delivered through schools.

# 4. Universal Vaccination Results

## 4.1. Low Incidence Season (2017–2018)

Supplementary table 7. Predicted outcomes of universal vaccination (low incidence season, 2017-2018)

| Outcome | | Universal influenza vaccination | Base case scenario  (current coverage) | Difference | Relative reduction |
| --- | --- | --- | --- | --- | --- |
| Symptomatic | 0- 4 y | 261000 [249000 ; 272000] | 750000 [732000 ; 766000] | 489000 [465000 ; 509000] | 65.24% [63.07% ; 66.92%] |
| 5 – 19 y | 1168000 [1117000 ; 1217000] | 4158000 [4068000 ; 4235000] | 2992000 [2878000 ; 3079000] | 71.9% [70.24% ; 73.25%] |
| 20 – 29 y | 171000 [163000 ; 178000] | 573000 [559000 ; 586000] | 402000 [384000 ; 417000] | 70.19% [68.46% ; 71.58%] |
| 30 – 39 y | 202000 [194000 ; 211000] | 675000 [659000 ; 689000] | 473000 [452000 ; 489000] | 69.95% [68.2% ; 71.34%] |
| 40 – 49 y | 288000 [276000 ; 301000] | 948000 [926000 ; 966000] | 661000 [632000 ; 683000] | 69.57% [67.76% ; 70.98%] |
| 50 – 59 y | 105000 [101000 ; 109000] | 352000 [344000 ; 359000] | 247000 [237000 ; 256000] | 70.23% [68.54% ; 71.53%] |
| 60+ y | 88000 [85000 ; 92000] | 266000 [261000 ; 272000] | 179000 [170000 ; 185000] | 66.87% [64.97% ; 68.43%] |
| **Total** | 2283000 [2186000 ; 2380000] | 7723000 [7549000 ; 7874000] | 5440000 [5220000 ; 5619000] | 70.43% [68.66% ; 71.81%] |
| GP consultations | 0- 4 y | 85000 [81000 ; 89000] | 245000 [239000 ; 250000] | 160000 [152000 ; 166000] | 65.24% [63.07% ; 66.92%] |
| 5 – 19 y | 266000 [254000 ; 277000] | 946000 [926000 ; 964000] | 681000 [655000 ; 701000] | 71.9% [70.24% ; 73.25%] |
| 20 – 29 y | 38000 [37000 ; 40000] | 129000 [126000 ; 132000] | 90000 [86000 ; 94000] | 70.19% [68.46% ; 71.58%] |
| 30 – 39 y | 45000 [44000 ; 47000] | 151000 [148000 ; 155000] | 106000 [101000 ; 110000] | 69.95% [68.2% ; 71.34%] |
| 40 – 49 y | 65000 [62000 ; 68000] | 213000 [208000 ; 217000] | 148000 [142000 ; 153000] | 69.57% [67.76% ; 70.98%] |
| 50 – 59 y | 24000 [23000 ; 25000] | 79000 [77000 ; 81000] | 56000 [53000 ; 57000] | 70.23% [68.54% ; 71.53%] |
| 60+ y | 33000 [32000 ; 35000] | 1e+05 [97000 ; 102000] | 67000 [64000 ; 69000] | 66.87% [64.97% ; 68.43%] |
| **Total** | 556000 [532000 ; 579000] | 1863000 [1821000 ; 1899000] | 1307000 [1254000 ; 1350000] | 70.15% [68.36% ; 71.55%] |
| Hospitalizations | 0- 4 y | 4000 [4000 ; 4000] | 11000 [10000 ; 11000] | 7000 [7000 ; 7000] | 65.24% [63.07% ; 66.92%] |
| 5 – 19 y | 1000 [1000 ; 1000] | 4000 [4000 ; 5000] | 3000 [3000 ; 3000] | 71.9% [70.24% ; 73.25%] |
| 20 – 29 y | 1000 [1000 ; 1000] | 2000 [2000 ; 2000] | 2000 [2000 ; 2000] | 70.19% [68.46% ; 71.58%] |
| 30 – 39 y | 1000 [1000 ; 1000] | 3000 [3000 ; 3000] | 2000 [2000 ; 2000] | 69.95% [68.2% ; 71.34%] |
| 40 – 49 y | 1000 [1000 ; 1000] | 4000 [4000 ; 4000] | 3000 [3000 ; 3000] | 69.57% [67.76% ; 70.98%] |
| 50 – 59 y | 2000 [2000 ; 2000] | 7000 [7000 ; 7000] | 5000 [5000 ; 5000] | 70.23% [68.54% ; 71.53%] |
| 60+ y | 3000 [3000 ; 3000] | 9000 [9000 ; 9000] | 6000 [6000 ; 6000] | 66.87% [64.97% ; 68.43%] |
| **Total** | 13000 [12000 ; 13000] | 40000 [39000 ; 41000] | 28000 [26000 ; 29000] | 68.26% [66.39% ; 69.7%] |
| Deaths | 0- 4 y | 10 [10 ; 10] | 30 [30 ; 30] | 20 [20 ; 20] | 65.24% [63.07% ; 66.92%] |
| 5 – 19 y | 20 [20 ; 30] | 90 [80 ; 90] | 60 [60 ; 60] | 71.9% [70.24% ; 73.25%] |
| 20 – 29 y | 20 [10 ; 20] | 50 [50 ; 50] | 40 [30 ; 40] | 70.19% [68.46% ; 71.58%] |
| 30 – 39 y | 20 [20 ; 20] | 60 [60 ; 60] | 40 [40 ; 40] | 69.95% [68.2% ; 71.34%] |
| 40 – 49 y | 30 [20 ; 30] | 90 [80 ; 90] | 60 [60 ; 60] | 69.57% [67.76% ; 70.98%] |
| 50 – 59 y | 140 [130 ; 150] | 470 [460 ; 480] | 330 [320 ; 340] | 70.23% [68.54% ; 71.53%] |
| 60+ y | 740 [710 ; 770] | 2230 [2180 ; 2270] | 1490 [1420 ; 1550] | 66.87% [64.97% ; 68.43%] |
| **Total** | 970 [930 ; 1020] | 3010 [2950 ; 3070] | 2050 [1950 ; 2120] | 67.72% [65.88% ; 69.22%] |
| Life Years lost | 0- 4 y | 0 [0 ; 0] | 1000 [1000 ; 1000] | 1000 [1000 ; 1000] | 65.24% [63.07% ; 66.92%] |
| 5 – 19 y | 1000 [1000 ; 1000] | 3000 [3000 ; 3000] | 2000 [2000 ; 2000] | 71.9% [70.24% ; 73.25%] |
| 20 – 29 y | 0 [0 ; 0] | 2000 [2000 ; 2000] | 1000 [1000 ; 1000] | 70.19% [68.46% ; 71.58%] |
| 30 – 39 y | 1000 [0 ; 1000] | 2000 [2000 ; 2000] | 1000 [1000 ; 1000] | 69.95% [68.2% ; 71.34%] |
| 40 – 49 y | 1000 [1000 ; 1000] | 2000 [2000 ; 2000] | 1000 [1000 ; 2000] | 69.57% [67.76% ; 70.98%] |
| 50 – 59 y | 3000 [3000 ; 3000] | 10000 [10000 ; 10000] | 7000 [7000 ; 7000] | 70.23% [68.54% ; 71.53%] |
| 60+ y | 9000 [9000 ; 10000] | 28000 [27000 ; 29000] | 19000 [18000 ; 20000] | 66.87% [64.97% ; 68.43%] |
| **Total** | 15000 [14000 ; 16000] | 47000 [46000 ; 48000] | 32000 [31000 ; 33000] | 68.2% [66.38% ; 69.67%] |
| QALY lost | 0- 4 y | 3000 [3000 ; 3000] | 8000 [8000 ; 8000] | 5000 [5000 ; 5000] | 65.24% [63.07% ; 66.92%] |
| 5 – 19 y | 11000 [11000 ; 12000] | 40000 [39000 ; 41000] | 29000 [28000 ; 30000] | 71.9% [70.24% ; 73.25%] |
| 20 – 29 y | 2000 [2000 ; 2000] | 7000 [7000 ; 7000] | 5000 [4000 ; 5000] | 70.19% [68.46% ; 71.58%] |
| 30 – 39 y | 2000 [2000 ; 2000] | 8000 [8000 ; 8000] | 5000 [5000 ; 6000] | 69.95% [68.2% ; 71.34%] |
| 40 – 49 y | 3000 [3000 ; 3000] | 11000 [10000 ; 11000] | 7000 [7000 ; 8000] | 69.57% [67.76% ; 70.98%] |
| 50 – 59 y | 3000 [3000 ; 4000] | 12000 [11000 ; 12000] | 8000 [8000 ; 8000] | 70.23% [68.54% ; 71.53%] |
| 60+ y | 8000 [8000 ; 8000] | 24000 [23000 ; 24000] | 16000 [15000 ; 17000] | 66.87% [64.97% ; 68.43%] |
| **Total** | 33000 [32000 ; 34000] | 109000 [106000 ; 111000] | 76000 [73000 ; 78000] | 69.67% [67.88% ; 71.05%] |
| Workdays lost * | 0- 4 y | 90000 [86000 ; 94000] | 259000 [252000 ; 264000] | 169000 [160000 ; 176000] | 65.24% [63.07% ; 66.92%] |
| 5 – 19 y | 281000 [269000 ; 293000] | 1e+06 [979000 ; 1019000] | 720000 [692000 ; 741000] | 71.9% [70.24% ; 73.25%] |
| 20 – 29 y | 75000 [72000 ; 78000] | 252000 [246000 ; 258000] | 177000 [169000 ; 183000] | 70.19% [68.46% ; 71.58%] |
| 30 – 39 y | 104000 [1e+05 ; 109000] | 347000 [339000 ; 354000] | 243000 [232000 ; 251000] | 69.95% [68.2% ; 71.34%] |
| 40 – 49 y | 149000 [143000 ; 156000] | 490000 [479000 ; 499000] | 341000 [327000 ; 353000] | 69.57% [67.76% ; 70.98%] |
| 50 – 59 y | 49000 [47000 ; 51000] | 164000 [160000 ; 167000] | 115000 [110000 ; 119000] | 70.23% [68.54% ; 71.53%] |
| 60+ y | 33000 [32000 ; 34000] | 99000 [97000 ; 101000] | 67000 [63000 ; 69000] | 66.87% [64.97% ; 68.43%] |
| **Total** | 781000 [748000 ; 814000] | 2611000 [2552000 ; 2663000] | 1831000 [1755000 ; 1893000] | 70.1% [68.31% ; 71.48%] |

**4.2. High Incidence Season (2015–2016)**

Supplementary table 8. Predicted outcomes of universal vaccination (high incidence season, 2015-2016)

| Outcome | | Universal influenza vaccination | Base case scenario  (current coverage) | Difference | Relative reduction |
| --- | --- | --- | --- | --- | --- |
| Symptomatic | 0- 4 y | 1449000 [1420000 ; 1483000] | 2320000 [2297000 ; 2353000] | 872000 [836000 ; 917000] | 37.63% [36.09% ; 39.12%] |
| 5 – 19 y | 5532000 [5452000 ; 5623000] | 9377000 [9329000 ; 9435000] | 3847000 [3751000 ; 3952000] | 41.02% [40% ; 42.04%] |
| 20 – 29 y | 981000 [962000 ; 1002000] | 1811000 [1793000 ; 1833000] | 830000 [807000 ; 858000] | 45.86% [44.69% ; 47.16%] |
| 30 – 39 y | 1112000 [1092000 ; 1134000] | 1948000 [1931000 ; 1969000] | 836000 [812000 ; 865000] | 42.93% [41.76% ; 44.16%] |
| 40 – 49 y | 1488000 [1464000 ; 1514000] | 2463000 [2445000 ; 2484000] | 976000 [948000 ; 1006000] | 39.6% [38.54% ; 40.7%] |
| 50 – 59 y | 586000 [575000 ; 597000] | 1062000 [1052000 ; 1075000] | 477000 [463000 ; 492000] | 44.91% [43.68% ; 46.09%] |
| 60+ y | 491000 [482000 ; 501000] | 805000 [796000 ; 815000] | 314000 [302000 ; 328000] | 39.08% [37.68% ; 40.47%] |
| **Total** | 11637000 [11451000 ; 11853000] | 19787000 [19647000 ; 19959000] | 8154000 [7923000 ; 8415000] | 41.21% [40.08% ; 42.37%] |
| GP consultations | 0- 4 y | 473000 [463000 ; 484000] | 757000 [749000 ; 768000] | 285000 [273000 ; 299000] | 37.63% [36.09% ; 39.12%] |
| 5 – 19 y | 1259000 [1241000 ; 1280000] | 2134000 [2123000 ; 2147000] | 876000 [854000 ; 899000] | 41.02% [40% ; 42.04%] |
| 20 – 29 y | 220000 [216000 ; 225000] | 406000 [403000 ; 411000] | 186000 [181000 ; 193000] | 45.86% [44.69% ; 47.16%] |
| 30 – 39 y | 250000 [245000 ; 255000] | 437000 [433000 ; 442000] | 188000 [182000 ; 194000] | 42.93% [41.76% ; 44.16%] |
| 40 – 49 y | 334000 [329000 ; 340000] | 553000 [549000 ; 558000] | 219000 [213000 ; 226000] | 39.6% [38.54% ; 40.7%] |
| 50 – 59 y | 131000 [129000 ; 134000] | 239000 [236000 ; 241000] | 107000 [104000 ; 111000] | 44.91% [43.68% ; 46.09%] |
| 60+ y | 183000 [180000 ; 187000] | 301000 [297000 ; 305000] | 117000 [113000 ; 122000] | 39.08% [37.68% ; 40.47%] |
| **Total** | 2851000 [2804000 ; 2904000] | 4827000 [4792000 ; 4871000] | 1978000 [1920000 ; 2044000] | 40.99% [39.82% ; 42.17%] |
| Hospitalizations | 0- 4 y | 20000 [20000 ; 21000] | 33000 [32000 ; 33000] | 12000 [12000 ; 13000] | 37.63% [36.09% ; 39.12%] |
| 5 – 19 y | 6000 [6000 ; 6000] | 10000 [10000 ; 10000] | 4000 [4000 ; 4000] | 41.02% [40% ; 42.04%] |
| 20 – 29 y | 4000 [4000 ; 4000] | 8000 [8000 ; 8000] | 3000 [3000 ; 4000] | 45.86% [44.69% ; 47.16%] |
| 30 – 39 y | 5000 [5000 ; 5000] | 8000 [8000 ; 8000] | 4000 [3000 ; 4000] | 42.93% [41.76% ; 44.16%] |
| 40 – 49 y | 6000 [6000 ; 6000] | 10000 [10000 ; 10000] | 4000 [4000 ; 4000] | 39.6% [38.54% ; 40.7%] |
| 50 – 59 y | 11000 [11000 ; 12000] | 21000 [20000 ; 21000] | 9000 [9000 ; 10000] | 44.91% [43.68% ; 46.09%] |
| 60+ y | 17000 [17000 ; 17000] | 28000 [28000 ; 28000] | 11000 [10000 ; 11000] | 39.08% [37.68% ; 40.47%] |
| **Total** | 70000 [69000 ; 71000] | 117000 [116000 ; 119000] | 48000 [46000 ; 50000] | 40.63% [39.34% ; 41.91%] |
| Deaths | 0- 4 y | 60 [60 ; 60] | 90 [90 ; 90] | 30 [30 ; 40] | 37.63% [36.09% ; 39.12%] |
| 5 – 19 y | 110 [110 ; 120] | 190 [190 ; 200] | 80 [80 ; 80] | 41.02% [40% ; 42.04%] |
| 20 – 29 y | 90 [90 ; 90] | 160 [160 ; 160] | 70 [70 ; 80] | 45.86% [44.69% ; 47.16%] |
| 30 – 39 y | 100 [100 ; 100] | 180 [170 ; 180] | 80 [70 ; 80] | 42.93% [41.76% ; 44.16%] |
| 40 – 49 y | 130 [130 ; 140] | 220 [220 ; 220] | 90 [90 ; 90] | 39.6% [38.54% ; 40.7%] |
| 50 – 59 y | 780 [770 ; 800] | 1420 [1410 ; 1440] | 640 [620 ; 660] | 44.91% [43.68% ; 46.09%] |
| 60+ y | 4110 [4030 ; 4190] | 6730 [6650 ; 6820] | 2630 [2530 ; 2740] | 39.08% [37.68% ; 40.47%] |
| **Total** | 5390 [5290 ; 5490] | 9000 [8910 ; 9110] | 3620 [3490 ; 3760] | 40.24% [38.91% ; 41.56%] |
| Life Years lost | 0- 4 y | 2000 [2000 ; 2000] | 3000 [3000 ; 3000] | 1000 [1000 ; 1000] | 37.63% [36.09% ; 39.12%] |
| 5 – 19 y | 4000 [4000 ; 4000] | 6000 [6000 ; 6000] | 3000 [3000 ; 3000] | 41.02% [40% ; 42.04%] |
| 20 – 29 y | 3000 [3000 ; 3000] | 5000 [5000 ; 5000] | 2000 [2000 ; 2000] | 45.86% [44.69% ; 47.16%] |
| 30 – 39 y | 3000 [3000 ; 3000] | 5000 [5000 ; 5000] | 2000 [2000 ; 2000] | 42.93% [41.76% ; 44.16%] |
| 40 – 49 y | 3000 [3000 ; 3000] | 6000 [6000 ; 6000] | 2000 [2000 ; 2000] | 39.6% [38.54% ; 40.7%] |
| 50 – 59 y | 17000 [16000 ; 17000] | 30000 [30000 ; 31000] | 14000 [13000 ; 14000] | 44.91% [43.68% ; 46.09%] |
| 60+ y | 52000 [51000 ; 53000] | 85000 [84000 ; 86000] | 33000 [32000 ; 35000] | 39.08% [37.68% ; 40.47%] |
| **Total** | 83000 [81000 ; 85000] | 140000 [138000 ; 142000] | 57000 [55000 ; 59000] | 40.81% [39.51% ; 42.08%] |
| QALY lost | 0- 4 y | 15000 [15000 ; 16000] | 25000 [24000 ; 25000] | 9000 [9000 ; 10000] | 37.63% [36.09% ; 39.12%] |
| 5 – 19 y | 54000 [53000 ; 54000] | 91000 [90000 ; 91000] | 37000 [36000 ; 38000] | 41.02% [40% ; 42.04%] |
| 20 – 29 y | 11000 [11000 ; 12000] | 21000 [21000 ; 21000] | 10000 [9000 ; 10000] | 45.86% [44.69% ; 47.16%] |
| 30 – 39 y | 13000 [12000 ; 13000] | 22000 [22000 ; 22000] | 10000 [9000 ; 10000] | 42.93% [41.76% ; 44.16%] |
| 40 – 49 y | 16000 [16000 ; 17000] | 27000 [27000 ; 28000] | 11000 [11000 ; 11000] | 39.6% [38.54% ; 40.7%] |
| 50 – 59 y | 19000 [19000 ; 20000] | 35000 [35000 ; 36000] | 16000 [15000 ; 16000] | 44.91% [43.68% ; 46.09%] |
| 60+ y | 44000 [43000 ; 45000] | 72000 [71000 ; 73000] | 28000 [27000 ; 29000] | 39.08% [37.68% ; 40.47%] |
| **Total** | 173000 [170000 ; 176000] | 293000 [291000 ; 296000] | 120000 [117000 ; 125000] | 41.11% [39.92% ; 42.31%] |
| Workdays lost * | 0- 4 y | 5e+05 [490000 ; 511000] | 8e+05 [792000 ; 811000] | 301000 [288000 ; 316000] | 37.63% [36.09% ; 39.12%] |
| 5 – 19 y | 1331000 [1311000 ; 1353000] | 2256000 [2244000 ; 2270000] | 925000 [902000 ; 951000] | 41.02% [40% ; 42.04%] |
| 20 – 29 y | 432000 [423000 ; 441000] | 796000 [789000 ; 806000] | 365000 [355000 ; 378000] | 45.86% [44.69% ; 47.16%] |
| 30 – 39 y | 571000 [561000 ; 583000] | 1e+06 [992000 ; 1011000] | 429000 [417000 ; 444000] | 42.93% [41.76% ; 44.16%] |
| 40 – 49 y | 769000 [757000 ; 782000] | 1273000 [1264000 ; 1284000] | 505000 [490000 ; 520000] | 39.6% [38.54% ; 40.7%] |
| 50 – 59 y | 273000 [268000 ; 278000] | 496000 [491000 ; 502000] | 222000 [216000 ; 230000] | 44.91% [43.68% ; 46.09%] |
| 60+ y | 183000 [180000 ; 187000] | 3e+05 [297000 ; 304000] | 117000 [113000 ; 122000] | 39.08% [37.68% ; 40.47%] |
| **Total** | 4058000 [3992000 ; 4135000] | 6921000 [6870000 ; 6986000] | 2865000 [2782000 ; 2960000] | 41.41% [40.25% ; 42.59%] |

# 5. References

1. Crépey P, Redondo E, Díez-Domingo J, Ortiz de Lejarazu R, Martinón-Torres F, Gil de Miguel Á, et al. From trivalent to quadrivalent influenza vaccines: Public health and economic burden for different immunization strategies in Spain. PloS one. 2020;15(5):e0233526.

2. Carrat F, Vergu E, Ferguson NM, Lemaitre M, Cauchemez S, Leach S, et al. Time lines of infection and disease in human influenza: a review of volunteer challenge studies. Am J Epidemiol. 1 de abril de 2008;167(7):775-85.

3. Estimating the burden of influenza‐related and associated hospitalizations and deaths in France: An eight‐season data study, 2010–2018 - Lemaitre - 2022 - Influenza and Other Respiratory Viruses - Wiley Online Library [Internet]. [citado 4 de julio de 2025]. Disponible en: https://onlinelibrary.wiley.com/doi/full/10.1111/irv.12962

4. Gutiérrez J, Bertozzi S. Vacunación contra influenza en adultos mayores en México: consideraciones económicas. Salud Pública Méx. 2005;47:234-9.

5. INEGI. Calculadora de Inflación [Internet]. 2023. Disponible en: https://www.inegi.org.mx/app/indicesdeprecios/CalculadoraInflacion.aspx

6. Pan American Health Organization (PAHO). PAHO Revolving Fund Vaccine Prices for 2023 [Internet]. 2023. Disponible en: https://www.paho.org/en/documents/paho-revolving-fund-vaccine-prices-2023

7. Skene KJ, Paltiel AD, Shim E, Galvani AP. A marginal benefit approach for vaccinating influenza «superspreaders». Medical decision making : an international journal of the Society for Medical Decision Making. mayo de 2014;34(4):536-49.

8. Prem K, Cook AR, Jit M. Projecting social contact matrices in 152 countries using contact surveys and demographic data. PLoS Comput Biol. septiembre de 2017;13(9):e1005697.

9. Barnett K, et al. Epidemiology of multimorbidity and implications for health care, research, and medical education: a cross-sectional study. The Lancet. 2012;380(9836).
